# Supplementary material for: Toll-like receptor agonists partially restore the production of pro-inflammatory cytokines and type I interferon in Sézary syndrome
Source: PubMed Central journal article supplement (PMC5342689; doi:10.18632/oncotarget.12816), 2016-10-21
Supplement: oncotarget-07-74592-s001.pdf [file oncotarget-07-74592-s001.pdf]

## Toll-like receptor agonists partially restore the production of pro-inflammatory cytokines and type I interferon in Sézary syndrome

### Supplementary Material

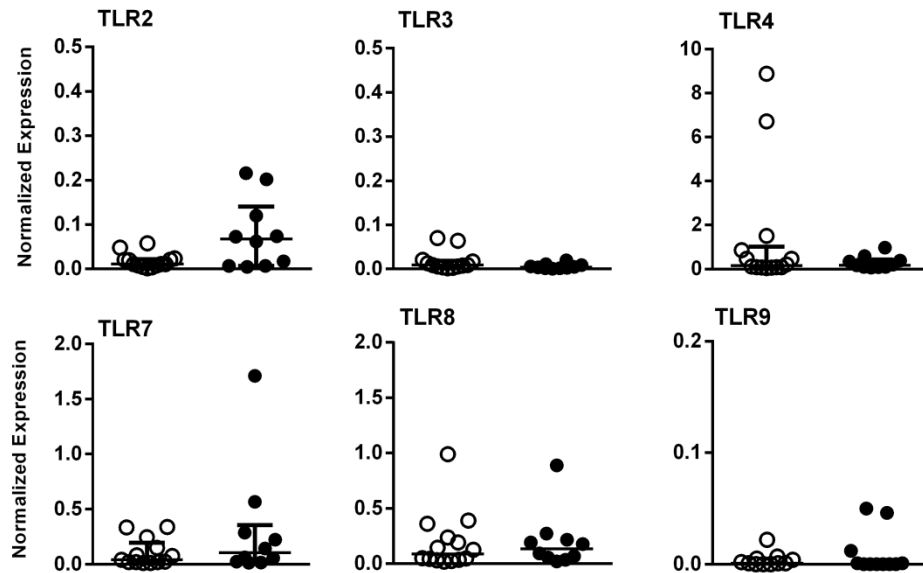

Figure 1 S. TLR mRNA expression in PBMC from SS patients and HC. The expression levels of TLR2, TLR3, TLR4, TLR7, TLR8 and TLR9 were analyzed in non-stimulated PBMC from SS patients (n=12, closed circle) and HC (n=15, open circle) by real-time PCR. The results are presented as medians and IQRs.

**Table S1.** Sézary Syndrome patients laboratorial characteristics.

| Pat N°. | Gender | Age | lymph. /mm <sup>3</sup> | eosin. /mm <sup>3</sup> | Sézary/ mm <sup>3</sup> | CD4 /mm <sup>3</sup> | CD8 /mm <sup>3</sup> | CD4 /CD8 | %CD4+ CD7- | %CD4+ CD26- | Tcell clone b/s/l | LDH /ref. |
|---------|--------|-----|-------------------------|-------------------------|-------------------------|----------------------|----------------------|----------|------------|-------------|-------------------|-----------|
| 1       | F      | 75  | 10200                   | 650                     | +                       | 9690                 | 204                  | 47.5     | nd         | 75          | +/+/+             | 1.2       |
| 2       | F      | 55  | 21370                   | 260                     | 5128                    | 20515                | 427                  | 48       | 97         | 98          | +/+/nd            | 1.2       |
| 3       | M      | 56  | 980                     | 300                     | -                       | 823                  | 29                   | 28       | 3          | 36          | +/nd/nd           | 1.6       |
| 4       | M      | 70  | 2200                    | 1100                    | 264                     | 2068                 | 66                   | 31       | nd         | 90          | +/-/nd            | 1.6       |
| 5       | F      | 62  | 2030                    | 750                     | +                       | 1705                 | 182                  | 9.3      | nd         | 52          | -/-/nd            | 1.4       |
| 7       | M      | 57  | 3490                    | 50                      | 419                     | 3176                 | 174                  | 18       | 82         | 74          | +/+/+             | 1.7       |
| 8       | M      | 68  | 6830                    | 150                     | 1639                    | 6251                 | 295                  | 22       | 81         | 86          | +/nd/+            | 1.0       |
| 9       | F      | 69  | 3070                    | 270                     | -                       | 2394                 | 888                  | 6        | 23         | 81          | +/+/nd            | 1.0       |
| 10      | M      | 56  | 7640                    | 340                     | 3667                    | 6647                 | 153                  | 43.5     | nd         | 79          | +/+/+             | 1.8       |
| 11      | M      | 62  | 8670                    | 0                       | +                       | 8150                 | 347                  | 24       | 41         | 52          | +/+/+             | 2.5       |
| 13      | M      | 48  | 21430                   | 10270                   | +                       | 20572                | 428                  | 48       | 2          | 22          | +/+/+             | 3.4       |
| 15      | F      | 60  | 131010                  | 1410                    | +                       | 104808               | 0                    | -        | 100        | 100         | +/+/+             | 1.7       |
| 16      | F      | 65  | 3700                    | 160                     | +                       | 3293                 | 148                  | 22.2     | 88         | 82          | +/-/-             | 1.8       |
| 17      | F      | 70  | 7370                    | 0                       | 1695                    | 6706                 | 147                  | 45.5     | 62         | 89          | +/+/nd            | 1.8       |

Reference values for: lymphocytes: 0.9 – 3.4/mm<sup>3</sup>; eosinophils: 0.05-0.5/ mm<sup>3</sup>; CD4 /mm<sup>3</sup>: 548-1724; CD8 /mm<sup>3</sup> : 330-1460; T cell clone blood/skin/lymph node: lactate dehydrogenase (LDH) ; ratio of sample value: maximum reference value; M: male. F: female. nd: not done.

Table S2. Sequences of the primers used for qPCR.

| Gene           | FW primer                    | REV primer                  |
|----------------|------------------------------|-----------------------------|
| IFN- $\alpha$  | 5'AAATACAGCCCTTGTGCCTGG 3'   | 5'GGTGAGCTGGCATAACGAATCA3'  |
| IFNR-1         | 5'GGCTGGCCCTGTGATATTTCTGTG3' | 5'ACCTGGCTCTCCTCCTCCCTTCT3' |
| IFN- $\lambda$ | 5'CGCCTTGGAAGAGTCACTCA3'     | 5'GAAGCCTCAGGTCCCAATTC3'    |
| IFN- $\gamma$  | 5'TTTCATGCCTGGTGCCTTCCA3'    | 5'GCTAAGAAGACTCCCCTCCCTA3'  |
| TNF- $\alpha$  | 5'CCCAGGCAGTCAGATCATCTTC3'   | 5'GCTTGAGGGTTTGCTACAACAT3'  |
| IL-10          | 5'CAGGGCACCCAGTCTGAG3'       | 5'CACATGCGCCTTGATGTCT3'     |
| IL-6           | 5'CCTGAGAAAGGAGACATGTAA3'    | 5'GGCAAGTCTCCTCATTGAATCC3'  |
| TLR2           | 5'TCAGCCTCTCCAAGGAAGAA3'     | 5'AATGTTCAAGACTGCCCAGG3'    |
| TLR3           | 5'GTGCCAGAACTTCCCATGT3'      | 5'TCCAGCTGAACCTGAGTTCC3'    |
| TLR4           | 5'CAGAGTTTCTGCAATGGATCA3'    | 5'GCTTATCTGAAGGTGTTGCACA3'  |
| TLR7           | 5'AATGTCACAGCCGTCCCTAC3'     | 5'GCGCATCAAAAGCATTTACA3'    |
| TLR8           | 5'TGTGATGGTGGTGCTTCAAT3'     | 5'ATGCCCCAGAGGCTATTTCT3'    |
| TLR9           | 5'GGGAGGAAGCTGCTAAGCTC3'     | 5'CTGGGAAGGACCAAGACCAC3'    |
